# Supplementary material
Source: publisher site journal article supplement (https://www.dovepress.com/article/411194)
Supplement: Supplementary file 1 [file get_supplementary_file.php]

Supplementary Material

Nomogram based on hemoglobin, albumin, lymphocyte and platelet score to predict overall survival in patients with T3-4N0-1 nasopharyngeal carcinoma

**Rong Zhao, Zhongguo Liang, Kaihua Chen, Xiaodong Zhu***

*** Correspondence:** Xiaodong Zhu: zhuxdonggxmu@126.com

# Supplementary Figure 1


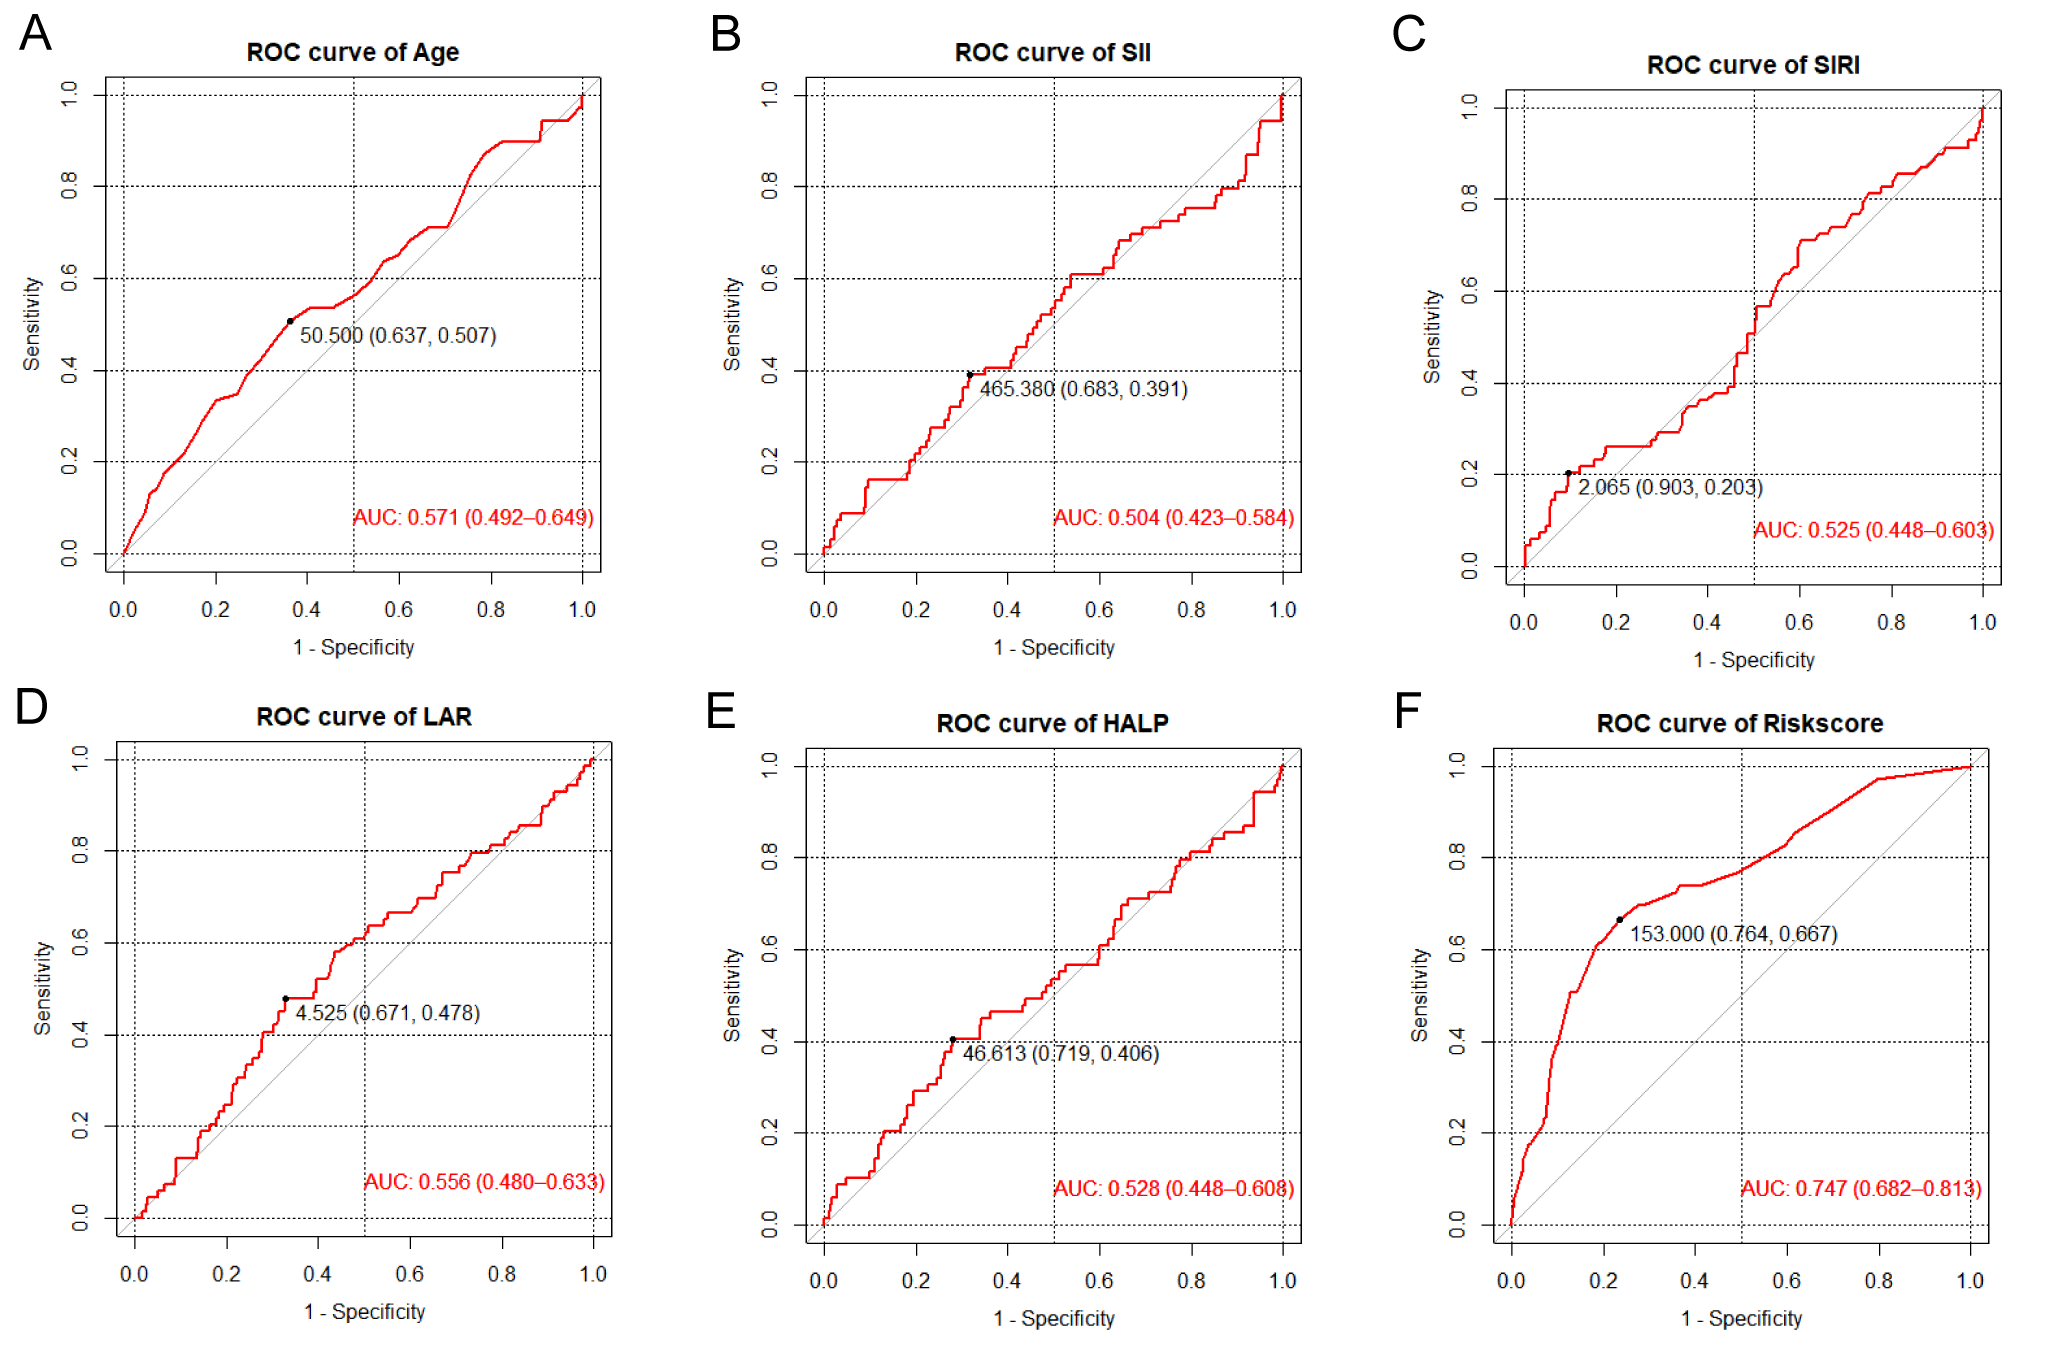


**Supplementary Figure 1.** ROC Curves of Continuous Variables.

**Notes:** ROC curve of age (**Figure** **A**) , ROC curve of SII (**Figure** **B**), ROC curve of SIRI (**Figure** **C**), ROC curve of LAR (**Figure** **D**), ROC curve of HALP (**Figure** **E**), ROC curve of risk score (**Figure** **F**).

**Abbreviations:** HALP, hemoglobin, albumin, lymphocyte and platelet score; LAR, lactic dehydrogenase-to-albumin ratio; SII, systemic immune inflammation index; SIRI, systemic inflammatory response index.

# Supplementary Tables

**Supplementary Table 1** Clinical Characteristics of Patients in the Training and Validation Cohorts

| **Characteristics** | **Total**  **(n =568)** | **Training Cohort**  **(n = 400)** | **Validation Cohort**  **(n = 168)** | **P** |
| --- | --- | --- | --- | --- |
| **WBC** (median [IQR]) | 6.58 [5.55, 7.89] | 6.46 [5.45, 7.91] | 6.79 [5.81, 7.88] | 0.150 |
| **Hb** (median [IQR]) | 138 [127, 148] | 138 [127, 147] | 140 [127, 149] | 0.322 |
| **PLT** (median [IQR]) | 272 [225, 317] | 272 [225, 315] | 275 [226, 323] | 0.577 |
| **NEU** (median [IQR]) | 3.97 [3.25, 5.04] | 3.93 [3.21, 4.95] | 4.08 [3.43, 5.18] | 0.109 |
| **MONO** (median [IQR]) | 0.44 [0.36, 0.56] | 0.44 [0.35, 0.57] | 0.44 [0.38, 0.54] | 0.823 |
| **LYM** (median [IQR]) | 1.78 [1.42, 2.20] | 1.77 [1.44, 2.18] | 1.81 [1.39, 2.22] | 0.691 |
| **ALB** (median [IQR]) | 40.5 [38.4, 43.3] | 40.3 [38.2, 43.0] | 40.8 [38.6, 43.8] | 0.092 |
| **SF** (median [IQR]) | 270 [140, 404] | 270 [151, 401] | 266 [125, 407] | 0.565 |
| **ALP** (median [IQR]) | 68 [58, 84] | 68 [57, 84] | 67 [58, 85] | 0.964 |
| **LDH** (median [IQR]) | 171 [148, 195] | 170 [149, 198] | 171 [148, 192] | 0.471 |

**Abbreviations**: IQR, interquartile range; WBC, white blood cells; Hb, hemoglobin; PLT, platelet; NEU, [neutrophil](javascript:;); MONO, [monocyte](javascript:;); LYM, lymphocyte; ALB, albumin; SF, serum ferritin; ALP, [alkaline phosphatase](javascript:;); LDH, [lactic dehydrogenase](javascript:;).

**Supplementary Table 2** Comparison of the C-Index of Models

| **Model** | **Training Cohort** | | **Validation Cohort** | |
| --- | --- | --- | --- | --- |
| **C-index [95%CI]** | **P** | **C-index [95%CI]** | **P** |
| **TNM** | 0.615 [0.554-0.676] |  | 0.646 [0.560-0.731] |  |
| **TNM+EBV DNA** | 0.691[0.626-0.755] | <0.001 | 0.699 [0.609-0.789] | 0.009 |
| **TNM+EBV DNA+Hb** | 0.689 [0.628-0.759] | <0.001 | 0.711 [0.617-0.806] | 0.016 |
| **TNM+EBV DNA+Hb+ALB** | 0.689 [0.619-0.758] | <0.001 | 0.712 [0.618-0.806] | 0.040 |
| **TNM+EBV DNA+Hb+ALB+LYM** | 0.697 [0.630-0.765] | <0.001 | 0.738 [0.656-0.821] | 0.016 |
| **TNM+EBV DNA+Hb+ALB+LYM+PLT** | 0.704 [0.638-0.770] | 0.002 | 0.740 [0.659-0.820] | 0.026 |
| **TNM+EBV DNA+HALP** | 0.712 [0.648-0.776] | <0.001 | 0.741 [0.660-0.821] | 0.004 |
| **TNM+EBV DNA+HALP+SIRI** | 0.727 [0.655-0.790] | <0.001 | 0.747 [0.666-0.827] | 0.009 |
| **TNM+EBV DNA+HALP+SIRI+LAR (Nomogram)** | 0.744 [0.681-0.806] | <0.001 | 0.757 [0.673-0.840] | 0.002 |

**Abbreviations**: EBV DNA, Epstein-Barr virus deoxyribonucleic acid; Hb, hemoglobin; PLT, platelet; LYM, lymphocyte; ALB, albumin; HALP, hemoglobin, albumin, lymphocyte and platelet score.

# Supplementary Table 3 Risk Scores of Variables

| **Variables** | **Risk Scores** |
| --- | --- |
| **TNM** |  |
| III | 0 |
| IVA | 84 |
| **EBV DNA** |  |
| <5000 | 0 |
| ≥5000 | 100 |
| **HALP** |  |
| <46.61 | 0 |
| ≥46.61 | 67 |
| **LAR** |  |
| <4.52 | 0 |
| ≥4.52 | 55 |
| **SIRI** |  |
| <2.06 | 0 |
| ≥2.06 | 81 |
| **3-year OS probability** |  |
| 0.3 | 403 |
| 0.4 | 375 |
| 0.5 | 347 |
| 0.6 | 316 |
| 0.7 | 279 |
| 0.8 | 231 |
| 0.9 | 155 |
| **5-year OS probability** |  |
| 0.1 | 385 |
| 0.2 | 349 |
| 0.3 | 319 |
| 0.4 | 291 |
| 0.5 | 263 |
| 0.6 | 232 |
| 0.7 | 195 |
| 0.8 | 147 |
| 0.9 | 71 |

**Abbreviations:** EBV DNA, Epstein-Barr virus deoxyribonucleic acid; HALP, hemoglobin, albumin, lymphocyte and platelet score; LAR, lactic dehydrogenase-to-albumin ratio; SIRI, systemic inflammatory response index; OS, overall survival.
